# Supplementary material
Source: HighWire-hosted journal article supplement (https://adc.bmj.com/content/107/4/323)
Supplement: inline-supplementary-material-5 [file inline-supplementary-material-5.pdf]

**Supplemental figure 4.** Prevalence of stunting (HAZ < -2SD) and severe stunting (HAZ < -3SD) with 95% confidence intervals from one month to approximately 12 years of age by intervention group. Stunting (HAZ < -2, upper sets of lines) and severe stunting (HAZ < -3, lower sets of lines) are shown.

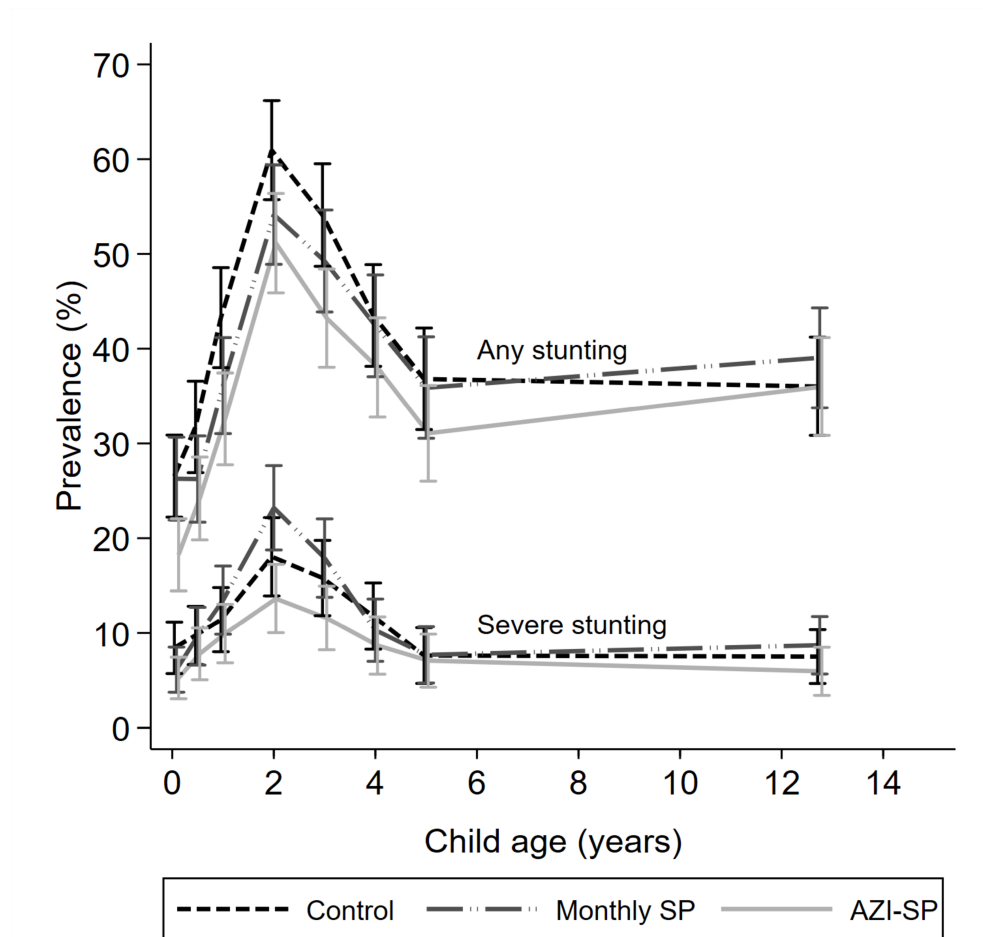

SP = sulfadoxine-pyrimethamine, AZI-SP = intervention group with monthly SP and two doses of azithromycin.
